# Supplementary material for: Gamma-glutamyltransferase activity in exosomes as a potential marker for prostate cancer
Source: Springer Nature journal article supplement (doi:10.1186/s12885-017-3301-x), 2017-05-05
Supplement: MOESM2 [file 12269248]

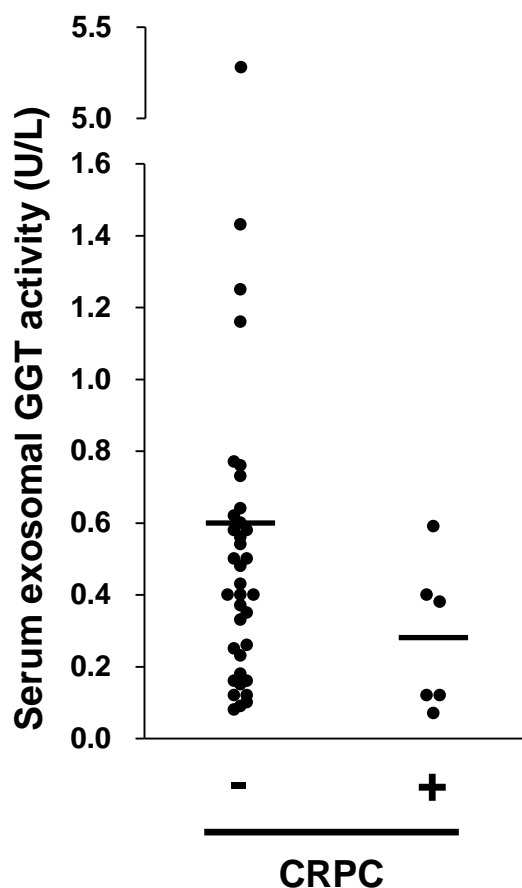

**Figure S1. GGT activity in exosomes isolated by differential centrifugation from serum of PC patients.** Exosomes were isolated by differential centrifugation from serum (210  $\mu$ L) of PC patients without (n=35) and with (n=6) castration-resistance. GGT activity in exosomes was determined by incubation with gGlu-HMRG at room temperature for 1 h and measurement of fluorescence intensity (Ex/Em 490/520 nm) using microplate reader.
