# Supplementary material for: Gamma-glutamyltransferase activity in exosomes as a potential marker for prostate cancer
Source: Springer Nature journal article supplement (doi:10.1186/s12885-017-3301-x), 2017-05-05
Supplement: MOESM4 [file 12269248]

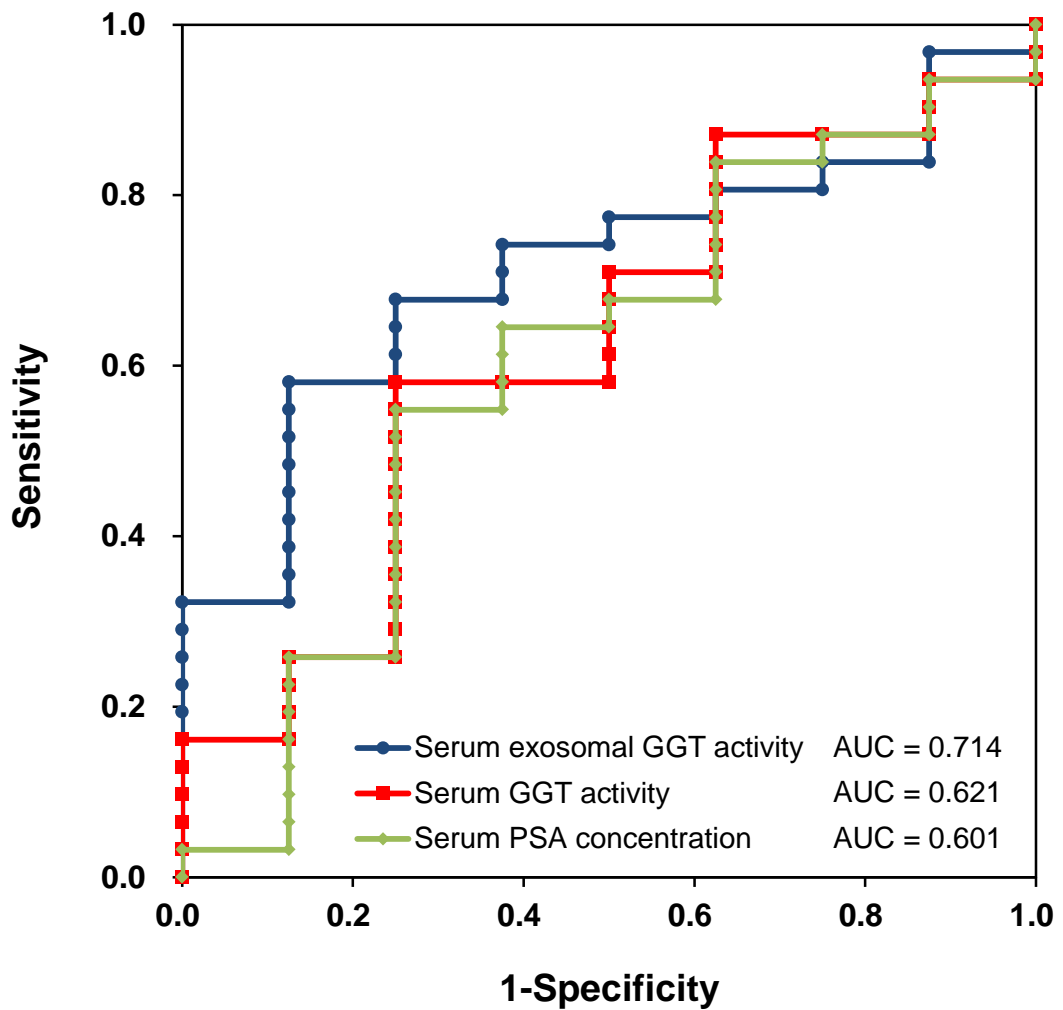

**Figure S2. ROC curve analysis of PC and BPH patients.**

The ROC curve was plotted and AUC was calculated for serum exosomal GGT activity, serum GGT activity and serum PSA concentration. The data for the sensitivity and 1 minus the specificity were plotted on a continuous scale.
